# Supplementary material
Source: HighWire-hosted journal article supplement (https://cmajopen.ca/highwire/filestream/80978/field_highwire_adjunct_files/2/open-2015-0107-original-submission.pdf)
Supplement: open-2015-0107-original-submission.pdf [file open-2015-0107-original-submission.pdf]

## Research Article

### **Sex Differences in the Outcomes of Peripheral Arterial Disease**

Mohamad A. Hussain MD, Thomas F. Lindsay MDCM MSc, Muhammad Mamdani PharmD  
MA MPH, Xuesong Wang MSc, Subodh Verma MD PhD, Mohammed Al-Omran MD MSc

From the Divisions of Vascular Surgery (M.A.H., M.A-O.) and Cardiac Surgery (S.V.) of St. Michael's Hospital, Li Ka Shing Knowledge Institute of St. Michael's Hospital (M.M., S.V., M.A-O), Toronto, Ontario, Canada; the Department of Surgery, University of Toronto, Toronto, Ontario, Canada (M.A.H., T.F.L., S.V., and M.A-O.); the Division of Vascular Surgery, Peter Munk Cardiac Centre, University Health Network, Toronto, Ontario, Canada (T.F.L.); the Institute of Health Policy, Management, and Evaluation (M.M) and the Leslie Dan Faculty of Pharmacy (M.M.) of the University of Toronto; the Applied Health Research Centre, Toronto, Ontario, Canada (M.M.); the King Saud University-Li Ka Shing Collaborative Research Program, and the Department of Surgery, King Saud University, Riyadh, Kingdom of Saudi Arabia (M.M., S.V., M.A-O.); and the Institute for Clinical Evaluative Sciences, Toronto, Ontario, Canada (M.M., X.W.)

#### **Address for correspondence:**

Mohammed Al-Omran, MD, MSc, FRCSC

Professor and Head, Division of Vascular Surgery, St. Michael's Hospital, 30 Bond Street, Suite 7-074, Bond Wing, Toronto, Ontario, M5B 1W8, Canada. Tel: 416-864-6047; Fax: 416-864-6012; Email: AlomranM@smh.ca

1  
2  
3 **Funding:** The Divisions of Vascular Surgery, Peter Munk Cardiac Centre, University Health  
4  
5 Network, and St. Michael's Hospital, Toronto, Ontario, Canada funded this study. In addition,  
6  
7 this study was supported by the Institute for Clinical Evaluative Sciences (ICES), which is  
8  
9 funded by an annual grant from the Ontario Ministry of Health and Long-Term Care  
10  
11 (MOHLTC). The opinions, results and conclusions reported in this paper are those of the authors  
12  
13 and are independent from the funding sources. No endorsement by ICES or the Ontario  
14  
15 MOHLTC is intended or should be inferred. Mohamad Hussain is supported in part by a  
16  
17 Canadian Institute for Health Research Canada Graduate Scholarship.  
18  
19  
20  
21  
22  
23  
24  
25  
26  
27  
28  
29  
30  
31  
32  
33  
34  
35  
36  
37  
38  
39  
40  
41  
42  
43  
44  
45  
46  
47  
48  
49  
50  
51  
52  
53  
54  
55  
56  
57  
58  
59  
60

**Competing Interests:** None

Confidential

## ABSTRACT

**Background:** The role of gender in the outcomes of patients with peripheral arterial disease (PAD) has been poorly studied. We sought to investigate differences in the long-term adverse cardiovascular (CV) and limb outcomes between male and female PAD patients.

**Methods:** A population-based cohort study with up to 7 years of follow-up was conducted using linked administrative databases in Ontario, Canada. Individuals aged 40 years or older who visited a vascular surgeon between 1 April 2004 and 31 March 2007 (index date), and carried a diagnosis of PAD comprised the study cohort. The primary outcome was a composite of death or hospitalization for stroke or myocardial infarction (MI). Secondary outcomes included lower limb amputation or revascularization. Cox proportional hazards modeling was used to compute unadjusted hazard ratios (HR), and HRs adjusted for baseline covariates.

**Results:** A total of 6,915 patients were studied. No significant differences in the risk of primary outcome were observed between men and women (adjusted HR, 0.99 [95% CI, 0.92 to 1.05];  $p = 0.64$ ), although women were less likely to undergo minor amputation (adjusted HR, 0.73 [95% CI, 0.62 to 0.85];  $p < 0.001$ ) and bypass surgery (adjusted HR, 0.82 [95% CI, 0.71 to 0.94];  $p = 0.004$ ) relative to men, but more likely to have an acute MI (adjusted HR, 1.15, [95% CI, 1.00 to 1.31];  $p = 0.048$ ). There were no differences in the rates of major amputation or transluminal percutaneous angioplasty between men and women.

**Conclusions:** We identified no significant differences in the risk of major adverse CV events between women and men, although our findings suggest men with PAD may be at an increased risk of adverse limb events compared to women. Cardiovascular health campaigns should focus on both men and women with PAD to raise awareness of this disease.

## INTRODUCTION

Peripheral arterial disease (PAD) is the third most common cause of cardiovascular (CV) morbidity after coronary heart disease and stroke. Furthermore, there has been a rapid increase in the number of people impacted by PAD over the last decade, with approximately 202 million people living with the disease globally in 2010 (1). In addition, data from the Global Burden of Disease projects in 1990 and 2010 demonstrated that although men have an overall greater burden of PAD, women experienced a much more dramatic increase in PAD-related death and disability over the last 20 years compared to men (2). Despite this, PAD is not currently positioned as a focus in national cardiovascular health programs for men and women in Canada (3).

Gender based differences in the clinical presentation and outcomes of men and women with other vascular diseases such as coronary heart disease are well documented (4–6), and several national initiatives have been established to tackle these differences in health care. Differences in the etiology and clinical presentation of men and women with PAD have also been suggested (7). However, long-term data on sex-based differences in the CV and limb outcomes of PAD patients are limited. Previous population-based studies have focused primarily on post-operative in-hospital outcomes of men and women with PAD, and their findings have been conflicting (8–10). To that end, a Scientific Statement from the American Heart Association published in 2012 indicated, “Cardiovascular mortality, all-cause mortality, and major coronary rates by gender (in patients with PAD) have not been well defined in population-based studies. (11).”

1  
2  
3 To address this gap in knowledge, we conducted a large population-based cohort study to  
4  
5 examine differences in major adverse CV and limb event rates between men and women with  
6  
7 PAD over the long-term.  
8  
9

## 10 11 12 13 14 15 **METHODS** 16

17  
18 **Setting.** We designed a retrospective population-based cohort study of men and women with  
19  
20 PAD using linked healthcare administrative databases in the province of Ontario, Canada over a  
21  
22 10-year period – from 1 April 2004 to 31 March 2013. Over 13 million residents of Ontario have  
23  
24 access to universal healthcare services funded by the Ministry of Health and Long Term Care.  
25  
26  
27

28  
29  
30 **Data sources.** We used the following linked Ontario administrative datasets to conduct this  
31  
32 study: the Canadian Institute for Health Information Discharge Abstract Database (captures all  
33  
34 hospital admission information including diagnoses and procedures), the Ontario Health  
35  
36 Insurance Plan Database (data from all inpatient and outpatient physician billing claims), the  
37  
38 Registered Persons Database (demographic and vital statistics data), the National Ambulatory  
39  
40 Care Reporting System (data from outpatient surgeries and emergency department visits), the  
41  
42 Institute for Clinical Evaluate Sciences Physicians Database (demographic and specialty  
43  
44 information about all physicians practicing in Ontario), and the Ontario Drug Benefit database  
45  
46 (data from medication prescriptions dispensed to Ontario residents aged 65 years or older). These  
47  
48 databases have shown to be of high quality (12); they have been validated for identifying a  
49  
50 variety of diagnoses and procedures (13–16), and they are routinely used for population-based  
51  
52 outcome studies (17–19).  
53  
54  
55  
56  
57  
58  
59  
60

1  
2  
3  
4  
5  
6 **Patients.** All men and women who were seen by a vascular surgeon in Ontario between 1 April  
7  
8 2004 and 31 March 2007, and carried a diagnosis of PAD within 3 years prior to that visit were  
9  
10 considered eligible for this study. PAD diagnosis was defined by using a previously validated  
11  
12 model-based billing code algorithm that has shown to be accurate in identifying PAD patients in  
13  
14 the non-invasive vascular lab and the community (20). Details of the billing code algorithm, and  
15  
16 the *International Statistical Classification of Diseases*, 9<sup>th</sup> and 10<sup>th</sup> edition codes used to identify  
17  
18 PAD patients can be found in **Appendix 1**. To restrict the analysis to patients with  
19  
20 atherosclerotic disease, we excluded those who were <40 years old.  
21  
22  
23  
24  
25  
26

27 **Outcome measures and follow-up.** The primary outcome was a composite of death or  
28  
29 hospitalization for acute myocardial infarction (MI) or stroke. Each individual component  
30  
31 outcome of the primary outcome was examined as a secondary outcome. We also examined the  
32  
33 following limb outcomes as secondary outcomes: major amputation (level of ankle, below-knee  
34  
35 or above-knee), minor amputation (toe or through-foot), peripheral arterial bypass surgery, and  
36  
37 percutaneous transluminal angioplasty (PTA). Hospitalization for congestive heart failure,  
38  
39 carotid endarterectomy, abdominal aortic aneurysm repair, coronary revascularization, and  
40  
41 initiation of dialysis were measured as tertiary outcomes. Follow-up was initiated on the day a  
42  
43 PAD patient had a clinical encounter with a vascular surgeon (cohort entry date). Patients were  
44  
45 followed until they experienced the primary endpoint, reached the maximum follow-up period of  
46  
47 7 years, or end of the study (31 March 2013).  
48  
49  
50  
51  
52  
53  
54  
55  
56  
57  
58  
59  
60

1  
2  
3  
4 **Covariates.** We controlled for confounding factors that might influence the effect of gender on  
5  
6 adverse cardiovascular outcomes by utilizing various linked administrative datasets. These  
7  
8 factors included: patient age, income level, medical comorbidities and overall comorbidity  
9  
10 burden, medication usage, and health services utilization (including hospitalizations, emergency  
11  
12 department visits and outpatient physician visits). Income level was estimated by linking the  
13  
14 patient's home postal code to Statistics Canada population census data in order to obtain the  
15  
16 median household income quintile (21). Overall comorbidity burden was estimated using the  
17  
18 Charlson comorbidity index with a 5-year look-back window in the datasets. This comorbidity  
19  
20 index has been validated to predict the probability of death from comorbid disease in patients  
21  
22 with PAD and aortic disease (22). In general, the risk of death from an increase of one Charlson  
23  
24 comorbidity score is equivalent to the risk of death from an additional decade of age (22). In  
25  
26 addition, we also controlled for patient ambulatory care grouping using the Comprehensive  
27  
28 Ambulatory Care Classification System (CACS), which is a national grouping methodology for  
29  
30 ambulatory care patient data. CACS places patient visits into groups that are clinically and  
31  
32 resource homogeneous, and can be used to further predict patient comorbidity burden and  
33  
34 healthcare resource utilization (23). We controlled for baseline medication usage by determining  
35  
36 the medication prescriptions dispensed to patients using the Ontario Drug Benefit database (12).  
37  
38  
39  
40  
41  
42  
43  
44

45 **Statistical analysis.** We used standardized differences to compare male and female patients'  
46  
47 baseline demographic and clinical characteristics. Standardized differences of less than 0.1  
48  
49 generally indicate good balance (24).  
50  
51  
52  
53  
54  
55  
56  
57  
58  
59  
60

1  
2  
3 We performed time-to-event analyses using multivariable Cox proportional hazards regression  
4 (PROC PHREG in SAS, version 9.4 [SAS Institute, Cary, North Carolina]) to compare outcomes  
5 of men and women with PAD, with men as the reference group. We generated unadjusted hazard  
6 ratios (HRs), and HRs adjusted for baseline demographic and clinical variables. We tested the  
7 proportional hazards assumption by visually inspecting log-log survival curves, and by  
8 examining the statistical significance of time-dependent covariates. We also generated  
9 unadjusted Kaplan-Meier curves with 95% confidence intervals (CIs) to demonstrate the  
10 cumulative incidence of primary and secondary outcomes.  
11  
12  
13  
14  
15  
16  
17  
18  
19  
20  
21  
22  
23  
24

25 Statistical significance was set at the 0.05 level, and all  $p$  values are two-tailed. All statistical  
26 analyses were conducted using SAS, version 9.4.  
27  
28  
29  
30  
31

## 32 RESULTS

33  
34 **Cohort identification and follow-up.** A total of 6,915 patients with PAD were included in our  
35 analysis. Of these patients, 2,461 (36%) were women. Median follow-up for the cohort was 5.4  
36 years (interquartile range, 1.8 to 7 years).  
37  
38  
39  
40  
41  
42  
43

44 **Baseline characteristics (Table 1).** Women with PAD were more likely to be older (72 versus  
45 69 years old for men), and they were more likely to be prescribed a calcium channel blocker at  
46 baseline. Men with PAD were more likely to have a history of coronary artery disease or  
47 diabetes mellitus, and they tended to have a higher Charlson comorbidity score, indicating a  
48 greater comorbidity burden. Men were also prescribed oral antihyperglycemic agents and statins  
49 at higher rates than women. Analysis of baseline income quintile, health services utilization and  
50  
51  
52  
53  
54  
55  
56  
57  
58  
59  
60



1  
2  
3 clinical encounters based on 17 unique ambulatory care groupings revealed no significant  
4  
5 differences between men and women.  
6  
7  
8  
9

10 **Primary outcome.** The primary outcome (composite of death or admission to hospital for either  
11 acute MI or stroke) occurred in 2,860 (64%) male and 1,644 (67%) female PAD patients.

12  
13 Women experienced the primary outcome at a higher rate in the unadjusted model (unadjusted  
14  
15 HR, 1.06 [95% CI, 1.002 to 1.13];  $p = 0.044$ ), although there was no significant difference in the  
16  
17 risk of primary outcome among men and women after controlling for baseline covariates  
18  
19 (adjusted HR, 0.99 [95% CI, 0.92 to 1.05];  $p = 0.64$ ) (**Table 2**). The cumulative incidence of the  
20  
21 primary outcome over follow-up is presented in **Figure 1**.  
22  
23  
24  
25  
26  
27  
28

29 **Secondary and tertiary outcomes.** With respect to secondary outcomes (**Table 2**), women  
30  
31 were less likely to undergo minor amputation (adjusted HR, 0.73 [95% CI, 0.62 to 0.85];  $p$   
32  
33  $<0.0001$ ), and arterial bypass surgery (adjusted HR, 0.82 [95% CI, 0.71 to 0.94];  $p = 0.004$ ) than  
34  
35 men, but more likely to be hospitalized for acute MI (adjusted HR, 1.15, [95% CI, 1.00 to 1.31];  
36  
37  $p = 0.048$ ). There were no differences in the rates of major amputation, PTA, stroke, or death  
38  
39 between men and women. The cumulative incidences of secondary limb outcomes are presented  
40  
41 in **Figure 2** and **Figure 3**. In addition, there were no significant differences in any of the tertiary  
42  
43 outcomes between men and women in the adjusted models.  
44  
45  
46  
47  
48  
49  
50

## 51 INTERPRETATION

52  
53 In this large population-based cohort study, we found no statistically significant differences  
54  
55 between women and men with respect to a composite risk of acute MI, stroke, or death.  
56  
57  
58  
59  
60

1  
2  
3 Secondary analyses revealed that female gender is associated with a higher risk of hospitalization  
4 due to MI, but a lower risk of minor amputation and arterial bypass surgery.  
5  
6  
7

8  
9  
10 Although prior studies have examined sex-related differences in the outcomes of PAD patients  
11 following peripheral arterial procedures, their findings have been conflicting. Jackson and  
12 colleagues recently reported data on 12,379 patients (41% female) that underwent peripheral  
13 vascular interventions. Although women experienced more procedure-related complications in  
14 this study, the rates of MI, stroke, death, and amputation did not differ among women and men  
15 (8). This study however was limited to in-hospital post-procedure follow-up. In contrast,  
16 Vouyouka and colleagues analyzed population-based data from 372,692 (44% female) PAD-  
17 related surgical hospitalizations, and reported a higher risk of postoperative complications, major  
18 amputations and mortality among women even after adjusting for baseline covariates (9). This  
19 study was also limited by a lack of longitudinal follow-up post-discharge, and only enrolled  
20 patients undergoing peripheral arterial revascularization or amputation procedures. Recent data  
21 from the US Nationwide Inpatient Sample suggests that women who undergo interventions for  
22 PAD have higher in-hospital mortality than men, although the rates for both men and women  
23 have declined over time, likely due to improvements in technology and medical therapy (10). No  
24 other clinical outcomes besides mortality were measured in this study due to a limitation of the  
25 administrative databases.  
26  
27  
28  
29  
30  
31  
32  
33  
34  
35  
36  
37  
38  
39  
40  
41  
42  
43  
44  
45  
46  
47  
48  
49

50 Our study has several strengths that provide unique insight into the influence of gender in PAD  
51 patients. First, unlike prior studies, the index event in our study cohort was not a surgical  
52 intervention for PAD, but rather a clinical encounter with a vascular surgeon and a prior  
53  
54  
55  
56  
57  
58  
59  
60

1  
2  
3 diagnosis of PAD. This approach allowed us to include inpatient and outpatient PAD patients  
4  
5 with varying levels of disease severity in our cohort. Prior studies have only focused on patients  
6  
7 with advanced PAD (critical limb ischemia or debilitating intermittent claudication) who  
8  
9 undergo peripheral arterial interventions (8–10,25,26). Findings from our study may be more  
10  
11 generalizable as we included a broader range of patients in our study. Second, our study provides  
12  
13 robust long-term data (median follow-up, 5.4 years), whereas prior population-based studies  
14  
15 have largely focused on in-hospital outcomes in this population. Third, we adjusted for several  
16  
17 factors that may confound the relationship between gender and PAD outcomes, such as:  
18  
19 socioeconomic status, healthcare service utilization, ambulatory care grouping, and overall  
20  
21 comorbidity burden. These factors play an important role in access to care, and have not been  
22  
23 measured in prior studies examining sex-related differences in PAD. Finally, our study provides  
24  
25 unique insight into the characteristics of PAD patients that have not been previously described.  
26  
27 For instance, we found that ~50% men and women with PAD belonged to the lowest two income  
28  
29 quintiles. Given socioeconomic class is closely associated with health status (27), our data  
30  
31 indicates further investigation is warranted to determine the impact of lower socioeconomic  
32  
33 status on the health outcomes of PAD patients.  
34  
35  
36  
37  
38  
39  
40  
41  
42

43 Our results also show that women with PAD tend to be older than men, which is consistent with  
44  
45 data from other studies (8–10,25). This may be because women are more likely to experience  
46  
47 atypical symptoms that are not characteristic of a classical history of intermittent claudication,  
48  
49 thus leading to a delay in PAD diagnosis (28,29). Furthermore, women with PAD have more  
50  
51 advanced disease at the time of presentation, as evidenced by a greater incidence of critical limb  
52  
53 ischemia (30,31) and faster functional decline (32). Although these clinical findings can be  
54  
55  
56  
57  
58  
59  
60

1  
2  
3 explained by advanced age, other factors such as an enhanced pro-inflammatory state (33),  
4  
5 impaired microvascular function (34) and greater burden of femoropopliteal lesions (35)  
6  
7  
8 observed in women with PAD may also contribute to more advanced disease compared to men.  
9

10  
11  
12 Although women were at an increased risk for acute MI, stroke, or death in the unadjusted  
13  
14 analysis, we found no differences among women and men after adjusting for age and other  
15  
16 covariates. This further indicates the importance of early diagnosis and treatment of women with  
17  
18 PAD, as gender-related differences in the rate of primary outcome are neutralized once  
19  
20 unbalanced baseline characteristics such as advanced age are taken into account. We did  
21  
22 however find two key differences between men and women with PAD in our secondary analyses  
23  
24 that merit discussion. First, we found that women were less likely to undergo minor amputation  
25  
26 and arterial bypass surgery compared to men. This may be because men were observed to have  
27  
28 to a greater comorbidity burden at baseline, including a prior history of diabetes mellitus, which  
29  
30 is a significant risk factor for advanced atherosclerosis and amputation (19). Second, we found  
31  
32 women with PAD were at an increased risk for acute MI in the adjusted analysis. Given women  
33  
34 with PAD in our study were on average 3 years older than men, this finding is consistent with  
35  
36 previous research that indicates women experience an acute MI at an older age than men (36).  
37  
38 We found no significant differences among women and men with respect to the adjusted rates of  
39  
40 stroke, death, major amputation, PTA, or any of the tertiary outcomes.  
41  
42  
43  
44  
45  
46  
47  
48  
49  
50

51 **Study Limitations.** Our study has several limitations. First, as with all observational studies, the  
52  
53 possibility remains that our results are biased by unmeasured differences between men and  
54  
55 women. However, this seems unlikely as we measured several demographic and clinical  
56  
57  
58  
59  
60

1  
2  
3 covariates at baseline, and we also adjusted our analyses for variables that may confound the  
4 relationship between gender and PAD outcomes. Second, inaccurate coding is a possible source  
5 of bias in population-based studies. To mitigate this risk, we used codes that have already been  
6 validated in our databases to identify PAD patients and their outcomes. The validated model-  
7 based billing code algorithm has good accuracy (86% sensitivity, 83% specificity, 91% positive  
8 predictive value [PPV], 74% negative predictive value) in identifying patients with PAD (20).  
9  
10 Coding for the major CV and limb outcomes of interest have also been validated in our databases  
11 through reabstraction studies, including: acute MI (83% sensitivity, 87% PPV), stroke (81%  
12 accuracy), arterial bypass surgery (87% sensitivity, 88% PPV), and major amputation (98%  
13 sensitivity, 96% PPV) (37). Finally, our databases did not allow us to determine the severity of  
14 PAD symptoms among our cohort. However, by including PAD patients who had a clinical  
15 encounter with a vascular surgeon, we are confident that our cohort represents a broad PAD  
16 population with varying severity of disease that is managed by vascular specialists.  
17  
18  
19  
20  
21  
22  
23  
24  
25  
26  
27  
28  
29  
30  
31  
32  
33  
34  
35  
36  
37

## 38 **CONCLUSIONS**

39 Our results suggest that although women with PAD tend to be older than men, no gender-based  
40 differences exist in the long-term risk of acute MI, stroke, or death in PAD patients after  
41 controlling for baseline risk factors. Men with PAD tend to have a higher comorbidity burden,  
42 and they may be at an increased risk for adverse limb events compared to women. Our results  
43 highlight the need to target both men and women in cardiovascular health campaigns to promote  
44 early diagnosis and management of PAD.  
45  
46  
47  
48  
49  
50  
51  
52  
53  
54  
55  
56  
57  
58  
59  
60

## REFERENCES

1. Fowkes FGR, Rudan D, Rudan I, et al. Comparison of global estimates of prevalence and risk factors for peripheral artery disease in 2000 and 2010: a systematic review and analysis. *Lancet* 2013;382:1329–40.
2. Sampson UKA, Fowkes FGR, McDermott MM, et al. Global and regional burden of death and disability from peripheral artery disease: 21 world regions, 1990 to 2010. *Glob Heart* 2014;9:145–58.
3. Lovell M, Harris K, Forbes T, et al. Peripheral arterial disease: lack of awareness in Canada. *Can J Cardiol* 2009;25:39–45.
4. Vaccarino V, Rathore SS, Wenger NK, et al. Sex and Racial Differences in the Management of Acute Myocardial Infarction, 1994 through 2002. *N Engl J Med* 2005;353:671–82.
5. Berger JS, Elliott L, Gallup D, et al. Sex differences in mortality following acute coronary syndromes. *JAMA* 2009;302:874–82.
6. Canto JG, Rogers WJ, Goldberg RJ, et al. Association of age and sex with myocardial infarction symptom presentation and in-hospital mortality. *JAMA* 2012;307:813–22.
7. Barochiner J, Aparicio LS, Waisman GD. Challenges associated with peripheral arterial disease in women. *Vasc Health Risk Manag* 2014;10:115–28.
8. Jackson EA, Munir K, Schreiber T, et al. Impact of sex on morbidity and mortality rates after lower extremity interventions for peripheral arterial disease: observations from the Blue Cross Blue Shield of Michigan Cardiovascular Consortium. *J Am Coll Cardiol* 2014;63:2525–30.

- 1  
2  
3 9. Vouyouka AG, Egorova NN, Salloum A, et al. Lessons learned from the analysis of gender  
4 effect on risk factors and procedural outcomes of lower extremity arterial disease. *J Vasc*  
5  
6  
7  
8  
9  
10  
11 10. Lo RC, Bensley RP, Dahlberg SE, et al. Presentation, treatment, and outcome differences  
12 between men and women undergoing revascularization or amputation for lower extremity  
13 peripheral arterial disease. *J Vasc Surg* 2014;59:409–18.  
14  
15  
16  
17  
18 11. Hirsch AT, Allison MA, Gomes AS, et al. A call to action: women and peripheral artery  
19 disease: a scientific statement from the American Heart Association. *Circulation*  
20  
21  
22 2012;125:1449–72.  
23  
24  
25 12. Levy AR, O'Brien BJ, Sellors C, et al. Coding accuracy of administrative drug claims in the  
26 Ontario Drug Benefit database. *Can J Clin Pharmacol* 2003;10:67–71.  
27  
28  
29 13. Austin PC, Daly PA, Tu JV. A multicenter study of the coding accuracy of hospital  
30 discharge administrative data for patients admitted to cardiac care units in Ontario. *Am Heart*  
31  
32  
33  
34  
35  
36  
37 14. Kokotailo RA, Hill MD. Coding of stroke and stroke risk factors using international  
38 classification of diseases, revisions 9 and 10. *Stroke* 2005;36:1776–81.  
39  
40  
41 15. Lee DS, Stitt A, Wang X, et al. Administrative hospitalization database validation of cardiac  
42 procedure codes. *Med Care* 2013;51:e22–6.  
43  
44  
45  
46 16. Hux JE, Ivis F, Flintoft V, et al. Diabetes in Ontario: determination of prevalence and  
47 incidence using a validated administrative data algorithm. *Diabetes Care* 2002;25:512–6.  
48  
49  
50  
51 17. Dhalla IA, Gomes T, Yao Z, et al. Chlorthalidone versus hydrochlorothiazide for the  
52 treatment of hypertension in older adults: a population-based cohort study. *Ann Intern Med*  
53  
54  
55  
56  
57  
58  
59  
60 2013;158:447–55.

- 1  
2  
3  
4  
5  
6  
7  
8  
9  
10  
11  
12  
13  
14  
15  
16  
17  
18  
19  
20  
21  
22  
23  
24  
25  
26  
27  
28  
29  
30  
31  
32  
33  
34  
35  
36  
37  
38  
39  
40  
41  
42  
43  
44  
45  
46  
47  
48  
49  
50  
51  
52  
53  
54  
55  
56  
57  
58  
59  
60
18. Park-Wyllie LY, Juurlink DN, Kopp A, et al. Outpatient gatifloxacin therapy and dysglycemia in older adults. *N Engl J Med* 2006;354:1352–61.
  19. Al-Omran M, Tu JV, Johnston KW, et al. Outcome of revascularization procedures for peripheral arterial occlusive disease in Ontario between 1991 and 1998: a population-based study. *J Vasc Surg* 2003;38:279–88.
  20. Fan J, Arruda-Olson AM, Leibson CL, et al. Billing code algorithms to identify cases of peripheral artery disease from administrative data. *J Am Med Inform Assoc* 2013;20:e349–54.
  21. Glazier RH, Creatore MI, Agha MM, et al. Socioeconomic misclassification in Ontario's Health Care Registry. *Can J Public Health* 2003;94:140–3.
  22. Charlson M, Szatrowski TP, Peterson J, et al. Validation of a combined comorbidity index. *J Clin Epidemiol* 1994;47:1245–51.
  23. Starfield B, Weiner J, Mumford L, et al. Ambulatory care groups: a categorization of diagnoses for research and management. *Health Serv Res* 1991;26:53–74.
  24. Austin PC. Using the Standardized Difference to Compare the Prevalence of a Binary Variable Between Two Groups in Observational Research. *Comm Statist Simulation Comput* 2009;38:1228–34.
  25. Wisman PP, Tangelder MJ, van Hattum ES, et al. Young women with PAD are at high risk of cardiovascular complications. *Eur J Vasc Endovasc Surg* 2012;43:441–5.
  26. Abando A, Akopian G, Katz SG. Patient sex and success of peripheral percutaneous transluminal arterial angioplasty. *Arch Surg* 2005;140:757–61.
  27. Isaacs SL, Schroeder SA. Class — The Ignored Determinant of the Nation's Health. *N Engl J Med* 2004;351:1137–42.



- 1  
2  
3  
4  
5  
6  
7  
8  
9  
10  
11  
12  
13  
14  
15  
16  
17  
18  
19  
20  
21  
22  
23  
24  
25  
26  
27  
28  
29  
30  
31  
32  
33  
34  
35  
36  
37  
38  
39  
40  
41  
42  
43  
44  
45  
46  
47  
48  
49  
50  
51  
52  
53  
54  
55  
56  
57  
58  
59  
60
28. Sigvant B, Lundin F, Nilsson B, et al. Differences in presentation of symptoms between women and men with intermittent claudication. *BMC Cardiovasc Disord* 2011;11:39.
  29. McDermott MM, Greenland P, Liu K, et al. Sex differences in peripheral arterial disease: leg symptoms and physical functioning. *J Am Geriatr Soc* 2003;51:222–8.
  30. Kumakura H, Kanai H, Araki Y, et al. Sex-related differences in Japanese patients with peripheral arterial disease. *Atherosclerosis* 2011;219:846–50.
  31. Sigvant B, Wiberg-Hedman K, Bergqvist D, et al. A population-based study of peripheral arterial disease prevalence with special focus on critical limb ischemia and sex differences. *J Vasc Surg* 2007;45:1185–91.
  32. McDermott MM, Ferrucci L, Liu K, et al. Women with peripheral arterial disease experience faster functional decline than men with peripheral arterial disease. *J Am Coll Cardiol* 2011;57:707–14.
  33. Gardner AW, Parker DE, Montgomery PS, et al. Gender and racial differences in endothelial oxidative stress and inflammation in patients with symptomatic peripheral artery disease. *J Vasc Surg* 2015;61:1249–57.
  34. Gardner AW, Montgomery PS, Blevins SM, et al. Gender and ethnic differences in arterial compliance in patients with intermittent claudication. *J Vasc Surg* 2010;51:610–5.
  35. Ortmann J, Nüesch E, Traupe T, et al. Gender is an independent risk factor for distribution pattern and lesion morphology in chronic critical limb ischemia. *J Vasc Surg* 2012;55:98–104.
  36. Anand SS, Islam S, Rosengren A, et al. Risk factors for myocardial infarction in women and men: insights from the INTERHEART study. *Eur Heart J* 2008;29:932–40.

1  
2  
3  
4  
5  
6  
7  
8  
9  
10  
11  
12  
13  
14  
15  
16  
17  
18  
19  
20  
21  
22  
23  
24  
25  
26  
27  
28  
29  
30  
31  
32  
33  
34  
35  
36  
37  
38  
39  
40  
41  
42  
43  
44  
45  
46  
47  
48  
49  
50  
51  
52  
53  
54  
55  
56  
57  
58  
59  
60

37. Juurlink DN, Preyra C, Coxford R, et al. Canadian Institute for Health Information discharge abstract database: a validation study. Toronto (ON): Institute for Clinical Evaluative Sciences; 2006.

Confidential

## FIGURE LEGENDS

**Figure 1.** Observed incidence of the primary outcome (acute myocardial infarction, stroke, or death). The error bars represent 95% confidence intervals.

**Figure 2.** Observed incidence of minor amputation (top) and major amputation (bottom). The error bars represent 95% confidence intervals.

**Figure 3.** Observed incidence of arterial bypass surgery (top) and percutaneous transluminal angioplasty (bottom). The error bars represent 95% confidence intervals.

Confidential

**Table 1.** Baseline demographic and clinical characteristics

| Characteristic                                            | Men<br>(n = 4,454) | Women<br>(n = 2,461) | Standardized<br>difference* |
|-----------------------------------------------------------|--------------------|----------------------|-----------------------------|
| Mean age $\pm$ SD, y                                      | 68.7 $\pm$ 10.6    | 71.6 $\pm$ 11.5      | 0.27                        |
| Charlson comorbidity, n (%)                               |                    |                      |                             |
| 0                                                         | 219 (4.9)          | 133 (5.4)            | -                           |
| 1                                                         | 953 (21.4)         | 619 (25.2)           | -                           |
| $\geq 2$                                                  | 2,735 (61.4)       | 1,384 (56.2)         | 0.11                        |
| Neighbourhood income quintile, n (%)                      |                    |                      |                             |
| 1 (Lowest)                                                | 1,149 (25.8)       | 641 (26.0)           | -                           |
| 2                                                         | 986 (22.1)         | 593 (24.1)           | -                           |
| 3                                                         | 833 (18.7)         | 432 (17.6)           | -                           |
| 4                                                         | 759 (17.0)         | 423 (17.2)           | -                           |
| 5 (Highest)                                               | 705 (15.8)         | 353 (14.3)           | -                           |
| Ambulatory care group, n (%)                              |                    |                      |                             |
| Nervous system diseases                                   | 122 (2.7)          | 61 (2.5)             | -                           |
| Eye diseases                                              | 7 (0.2)            | 5 (0.2)              | -                           |
| Ear, nose, mouth and throat diseases                      | 34 (0.8)           | 23 (0.9)             | -                           |
| Respiratory diseases                                      | 113 (2.5)          | 77 (3.1)             | -                           |
| Circulatory system diseases                               | 885 (19.9)         | 525 (21.3)           | -                           |
| Digestive system diseases                                 | 135 (3.0)          | 108 (4.4)            | -                           |
| Hepatobiliary and pancreatic diseases                     | 24 (0.5)           | 6 (0.2)              | -                           |
| Musculoskeletal and connective tissue diseases            | 181 (4.1)          | 117 (4.8)            | -                           |
| Skin, subcutaneous tissue, and breast diseases            | 418 (9.4)          | 239 (9.7)            | -                           |
| Endocrine, nutritional, and metabolic diseases            | 325 (7.3)          | 126 (5.1)            | -                           |
| Kidney and genitourinary tract diseases                   | 297 (6.7)          | 148 (6.0)            | -                           |
| Haematological diseases                                   | 26 (0.6)           | 17 (0.7)             | -                           |
| Oncological diseases                                      | 37 (0.8)           | 7 (0.3)              | -                           |
| Systematic infections                                     | 34 (0.8)           | 8 (0.3)              | -                           |
| Mental diseases                                           | 18 (0.4)           | 13 (0.5)             | -                           |
| Examination and other health factors                      | 384 (8.6)          | 191 (7.8)            | -                           |
| Trauma, coma and toxic effects                            | 258 (5.8)          | 147 (6.0)            | -                           |
| Health service utilization                                |                    |                      |                             |
| Mean outpatient physician visits in past year $\pm$ SD    | 17.0 $\pm$ 11.1    | 16.6 $\pm$ 10.2      | -                           |
| Mean emergency department visits in past 3 years $\pm$ SD | 3.9 $\pm$ 5.3      | 4.0 $\pm$ 5.1        | -                           |
| Mean hospital admissions in past 3 years $\pm$ SD         | 2.8 $\pm$ 2.3      | 2.8 $\pm$ 2.2        | -                           |
| Medications, n (%) <sup>†</sup>                           |                    |                      |                             |
| Oral antihyperglycemic                                    | 798 (28.4)         | 382 (21.9)           | 0.15                        |
| Insulin                                                   | 505 (18.0)         | 263 (15.1)           | -                           |
| Statin                                                    | 1,715 (61.0)       | 949 (54.5)           | 0.13                        |
| Beta-blocker                                              | 1,403 (49.9)       | 838 (48.1)           | -                           |
| Calcium channel blocker                                   | 1,086 (38.6)       | 831 (47.7)           | 0.18                        |
| ACE inhibitor or ARB                                      | 1,999 (71.1)       | 1,206 (69.2)         | -                           |
| Diuretic                                                  | 1,017 (36.2)       | 701 (40.2)           | -                           |

|                                       |              |              |      |
|---------------------------------------|--------------|--------------|------|
| Any anti-hypertensive                 | 2,470 (87.9) | 1,545 (88.7) | -    |
| Clopidogrel                           | 348 (12.4)   | 198 (11.4)   | -    |
| Acetylsalicylic acid                  | 604 (21.5)   | 365 (21.0)   | -    |
| Warfarin                              | 719 (25.6)   | 372 (21.4)   | -    |
| Comorbid conditions, n (%)            |              |              |      |
| Congestive heart failure              | 721 (16.2)   | 388 (15.8)   | -    |
| Stroke                                | 180 (4.0)    | 98 (4.0)     | -    |
| Acute myocardial infarction           | 564 (12.7)   | 250 (10.2)   | -    |
| Coronary artery disease               | 1,173 (26.3) | 495 (20.1)   | 0.15 |
| Chronic obstructive pulmonary disease | 359 (8.1)    | 240 (9.8)    | -    |
| Chronic kidney disease                | 871 (19.6)   | 403 (16.4)   | -    |
| Diabetes mellitus                     | 1,694 (38.0) | 776 (31.5)   | 0.14 |

Note: SD = standardized deviation; ACE = angiotensin-converting enzyme; ARB = angiotensin-receptor blocker.

\*Standardized difference of >0.1 indicates significant difference.

†Medication usage is reported only for those aged 66 years or older.

Confidential

**Table 2.** Outcomes of men and women with peripheral arterial disease

| Outcome                    | Men*<br>(n = 4,454) | Women*<br>(n = 2,461) | Unadjusted HR<br>(95% CI) | p value | Adjusted HR<br>(95% CI) | p value |
|----------------------------|---------------------|-----------------------|---------------------------|---------|-------------------------|---------|
| Primary outcome†           | 2860 (64.2)         | 1644 (66.8)           | 1.06 (1.00-1.13)          | 0.044   | 0.99 (0.92-1.05)        | 0.6     |
| Secondary outcomes         |                     |                       |                           |         |                         |         |
| Acute MI                   | 618 (13.9)          | 360 (14.6)            | 1.07 (0.94-1.22)          | 0.3     | 1.15 (1.00-1.31)        | 0.048   |
| Stroke                     | 229 (5.1)           | 140 (5.7)             | 1.13 (0.92-1.40)          | 0.3     | 1.02 (0.82-1.27)        | 0.9     |
| Death                      | 2562 (57.5)         | 1468 (59.7)           | 1.06 (0.99-1.13)          | 0.092   | 0.96 (0.90-1.03)        | 0.2     |
| Major amputation           | 764 (17.2)          | 375 (15.2)            | 0.89 (0.79-1.01)          | 0.064   | 0.95 (0.84-1.08)        | 0.4     |
| Minor amputation           | 583 (13.1)          | 211 (8.6)             | 0.65 (0.55-0.76)          | <0.0001 | 0.73 (0.62-0.85)        | <0.0001 |
| Arterial bypass surgery    | 685 (15.4)          | 311 (12.6)            | 0.82 (0.72-0.94)          | 0.004   | 0.82 (0.71-0.94)        | 0.004   |
| PTA                        | 609 (13.7)          | 330 (13.4)            | 0.99 (0.87-1.14)          | 0.9     | 1.04 (0.90-1.19)        | 0.6     |
| Tertiary outcomes          |                     |                       |                           |         |                         |         |
| Congestive heart failure   | 1144 (25.7)         | 623 (25.3)            | 1.01 (0.92-1.11)          | 0.9     | 1.01 (0.91-1.12)        | 0.9     |
| Carotid endarterectomy     | 82 (1.8)            | 34 (1.4)              | 0.76 (0.51-1.14)          | 0.2     | 0.77 (0.50-1.12)        | 0.2     |
| AAA repair                 | 271 (6.1)           | 126 (5.1)             | 0.85 (0.69-1.05)          | 0.1     | 0.92 (0.74-1.15)        | 0.5     |
| Coronary revascularization | 442 (9.9)           | 187 (7.6)             | 0.77 (0.65-0.91)          | 0.002   | 0.85 (0.71-1.02)        | 0.076   |
| Initiation of dialysis     | 749 (16.8)          | 322 (13.1)            | 0.77 (0.68-0.88)          | 0.0001  | 0.89 (0.78-1.03)        | 0.1     |

Note: HR = hazard ratio; CI = confidence interval; MI = myocardial infarction; PTA = percutaneous transluminal angioplasty; AAA = abdominal aortic aneurysm.

\*Values are presented as n (%).

†A composite of death or hospitalization with acute myocardial infarction or stroke.

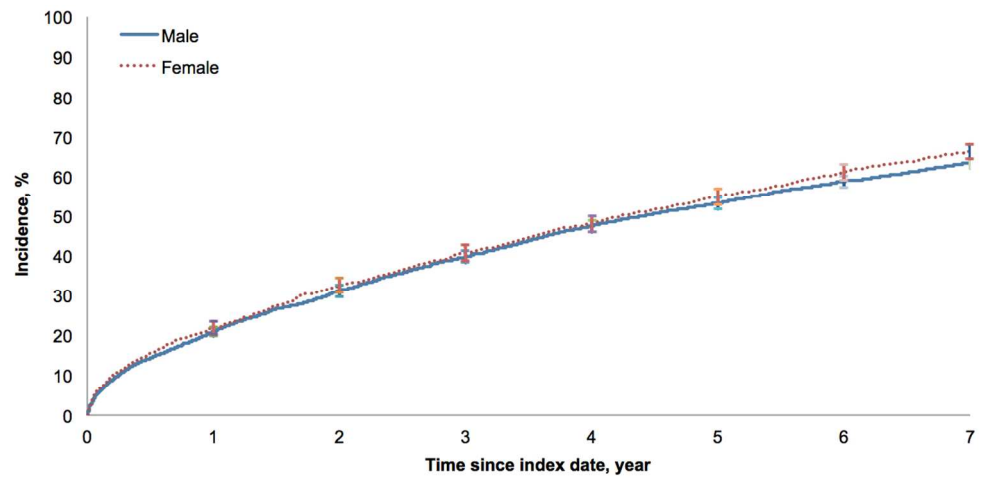

Observed incidence of the primary outcome (acute myocardial infarction, stroke, or death). The error bars represent 95% confidence intervals.  
244x116mm (144 x 144 DPI)

1  
2  
3  
4  
5  
6  
7  
8  
9  
10  
11  
12  
13  
14  
15  
16  
17  
18  
19  
20  
21  
22  
23  
24  
25  
26  
27  
28  
29  
30  
31  
32  
33  
34  
35  
36  
37  
38  
39  
40  
41  
42  
43  
44  
45  
46  
47  
48  
49  
50  
51  
52  
53  
54  
55  
56  
57  
58  
59  
60

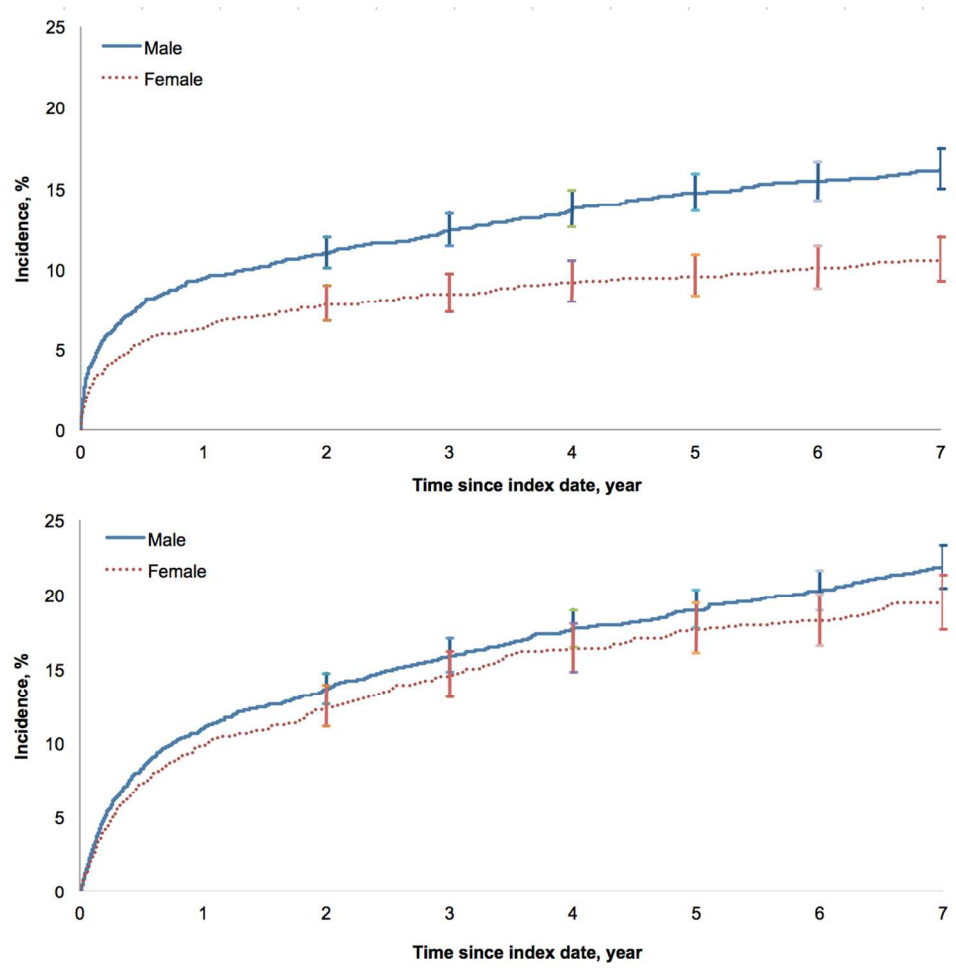

Observed incidence of minor amputation (top) and major amputation (bottom). The error bars represent 95% confidence intervals.  
239x235mm (144 x 144 DPI)



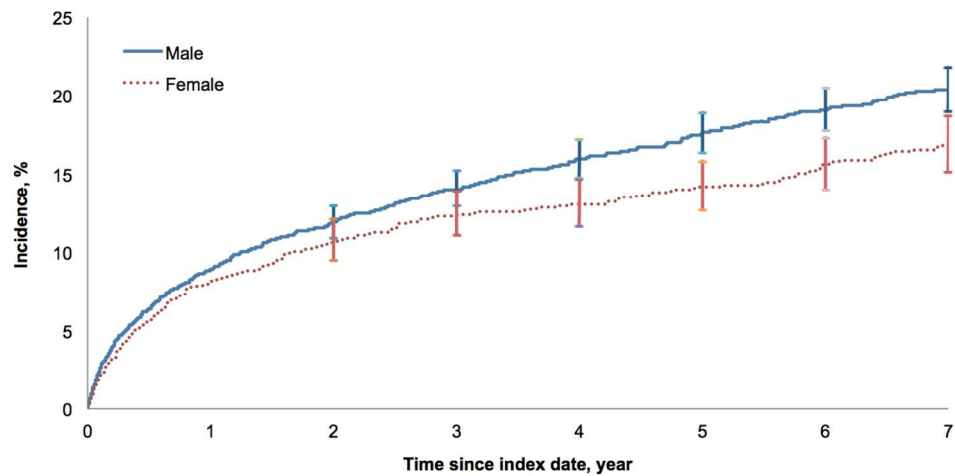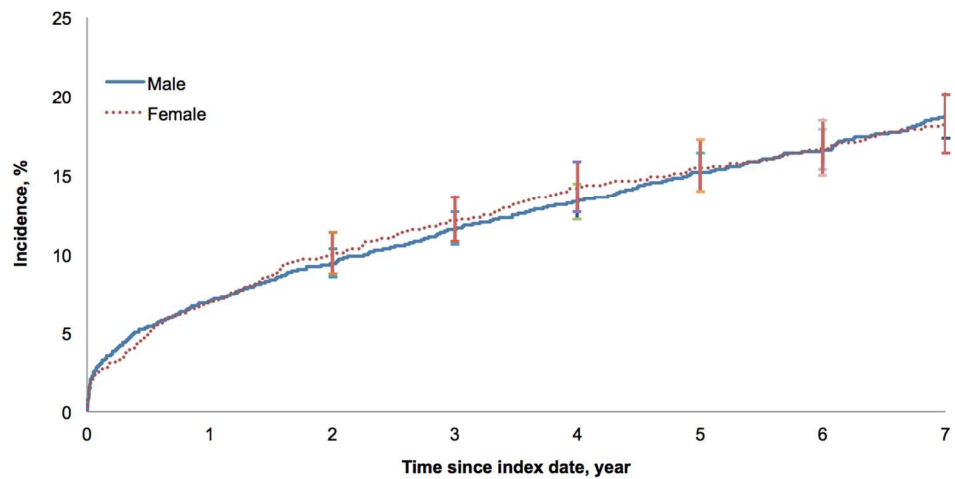

Observed incidence of arterial bypass surgery (top) and percutaneous transluminal angioplasty (bottom).  
The error bars represent 95% confidence intervals.  
239x234mm (144 x 144 DPI)

## APPENDIX 1

### Diagnosis and Procedure Codes Used to Identify Peripheral Arterial Disease Patients\*

| Variable                                                     | ICD-9  | ICD- 10                                                                                                                     |
|--------------------------------------------------------------|--------|-----------------------------------------------------------------------------------------------------------------------------|
| Diagnosis codes                                              |        |                                                                                                                             |
| ASO extremities with gangrene                                | 440.24 | I70.2                                                                                                                       |
| ASO extremities with IC                                      | 440.21 | I70.2                                                                                                                       |
| ASO extremities with ulceration                              | 440.23 | I70.2                                                                                                                       |
| ASO extremities, unspecified                                 | 440.20 | I70.2                                                                                                                       |
| ASO extremities with rest pain                               | 440.22 | I70.2                                                                                                                       |
| PVD, unspecified                                             | 443.9  | I73.9                                                                                                                       |
| Generalized and unspecified ASO                              | 440.9  | I7.09                                                                                                                       |
| Procedure codes                                              |        |                                                                                                                             |
| Amputation of toe                                            |        | CCI: 1WK93                                                                                                                  |
|                                                              |        | Records with the following ICD-10 diagnosis codes excluded:<br>C40, D16, D48.0, D48.1, D48.2, Q65-Q79, S70 – S99, T20 – T32 |
| Angiography, extremity, bilateral, radiological              |        | CCI: 3KG10 + variable code: BL (bilateral legs)                                                                             |
| MRA lower extremity with or without contrast                 |        | CCI: 3KG40                                                                                                                  |
| Angiography, extremity, unilateral, radiological             |        | CCI: 3KG10 + variable code: LL (left leg), or RL (right leg)                                                                |
| CT angiogram- abdominal aorta and lower extremity runoff     |        | CCI: 3KG20                                                                                                                  |
| Non-invasive physiologic studies of lower extremity arteries |        | CCI: 3KG30                                                                                                                  |

\*Codes were used in combination with a model-based billing code algorithm validated by Fan and colleagues (20) to identify patients with peripheral arterial disease.  
ICD = International Statistical Classification of Diseases; ASO = atherosclerosis; CCI = Canadian Classification of Health Interventions; MRA = magnetic resonance angiography; CT = computed tomography.
